# Supplementary material for: Cross-Kingdom Interaction of miRNAs and Gut Microbiota with Non-Invasive Diagnostic and Therapeutic Implications in Colorectal Cancer
Source: MDPI journal article supplement (doi:10.3390/ijms241310520), 2023-06-23
Supplement: s1 [file s1]

| miRNA        | Status in CRC | miRNA Source:     | Reference                                  | Ref. No.              |
|--------------|---------------|-------------------|--------------------------------------------|-----------------------|
| let 7d       | Downregulated | serum             | <a href="#">(Hofsli et al. 2013)</a>       | <a href="#">[162]</a> |
| let-7a-5p    | Downregulated | stool             | <a href="#">(Ghanbari et al. 2015)</a>     | <a href="#">[163]</a> |
| let-7c       | Downregulated | cell culture      | <a href="#">(Han et al. 2012)</a>          | <a href="#">[164]</a> |
| let-7e-5p    | Upregulated   | plasma            | <a href="#">(Silva et al. 2021)</a>        | <a href="#">[165]</a> |
| let-7f-5p    | Downregulated | stool             | <a href="#">(Ghanbari et al. 2015)</a>     | <a href="#">[163]</a> |
| let-7f-5p    | Upregulated   | serum             | <a href="#">(Dokhanchi et al. 2021)</a>    | <a href="#">[166]</a> |
| let-7g       | Upregulated   | plasma            | <a href="#">(Cho et al. 2021)</a>          | <a href="#">[167]</a> |
| let-7g       | Upregulated   | serum             | <a href="#">(Wang et al. 2014)</a>         | <a href="#">[168]</a> |
| miR-100      | Downregulated | lymph node tissue | <a href="#">(Wang et al. 2021)</a>         | <a href="#">[169]</a> |
| miR-103      | Downregulated | serum             | <a href="#">(Hofsli et al. 2013)</a>       | <a href="#">[162]</a> |
| miR-103a-3p  | Upregulated   | cell culture      | <a href="#">(Zhang et al. 2019)</a>        | <a href="#">[170]</a> |
| miR-106a     | Upregulated   | plasma            | <a href="#">(Silva et al. 2021)</a>        | <a href="#">[165]</a> |
| miR-106a     | Downregulated | serum             | <a href="#">(Hofsli et al. 2013)</a>       | <a href="#">[162]</a> |
| miR-106a     | Upregulated   | plasma            | <a href="#">(Chen et al. 2015)</a>         | <a href="#">[171]</a> |
| miR-106a     | Upregulated   | stool             | <a href="#">(Koga et al. 2013)</a>         | <a href="#">[49]</a>  |
| miR-106a     | Upregulated   | serum             | <a href="#">(Li et al. 2015)</a>           | <a href="#">[172]</a> |
| miR-106a-5p  | Upregulated   | plasma            | <a href="#">(Silva et al. 2021)</a>        | <a href="#">[165]</a> |
| miR-106b     | Upregulated   | plasma            | <a href="#">(Luo et al. 2013)</a>          | <a href="#">[173]</a> |
| miR-107      | Downregulated | serum             | <a href="#">(Hofsli et al. 2013)</a>       | <a href="#">[162]</a> |
| miR-1180     | Upregulated   | serum             | <a href="#">(Ho et al. 2015)</a>           | <a href="#">[174]</a> |
| miR-124      | Downregulated | plasma            | <a href="#">(Ahmed et al. 2012)</a>        | <a href="#">[175]</a> |
| miR-125      | Upregulated   | blood             | <a href="#">(B. Chen et al. 2019)</a>      | <a href="#">[48]</a>  |
| miR-1260b    | Upregulated   | tumor tissue      | <a href="#">(Liu et al. 2016)</a>          | <a href="#">[176]</a> |
| miR-127-3p   | Upregulated   | plasma            | <a href="#">(Zhang et al. 2019)</a>        | <a href="#">[170]</a> |
| miR-127-5p   | Downregulated | plasma            | <a href="#">(Ahmed et al. 2012)</a>        | <a href="#">[175]</a> |
| miR-1290     | Upregulated   | serum             | <a href="#">(Imaoka et al. 2016)</a>       | <a href="#">[177]</a> |
| miR-1295b-4p | Downregulated | stool             | <a href="#">(Ghanbari et al. 2015)</a>     | <a href="#">[163]</a> |
| miR-130a     | Upregulated   | plasma            | <a href="#">(X. Liu, Pan, et al. 2018)</a> | <a href="#">[178]</a> |
| miR-133a     | Upregulated   | plasma            | <a href="#">(Luo et al. 2013)</a>          | <a href="#">[173]</a> |
| miR-133b     | Downregulated | tumor tissue      | <a href="#">(Xie et al. 2021)</a>          | <a href="#">[179]</a> |
| miR-135b     | Upregulated   | stool             | <a href="#">(Wu et al. 2014)</a>           | <a href="#">[27]</a>  |
| miR-135b     | Upregulated   | stool             | <a href="#">(Koga et al. 2010)</a>         | <a href="#">[180]</a> |
| miR-135b     | Upregulated   | tumor tissue      | <a href="#">(Uratani et al. 2016)</a>      | <a href="#">[181]</a> |
| miR-137      | Downregulated | tumor tissue      | <a href="#">(Chen et al. 2017)</a>         | <a href="#">[182]</a> |
| miR-138      | Downregulated | plasma            | <a href="#">(Ahmed et al. 2012)</a>        | <a href="#">[175]</a> |
| miR-139-3p   | Downregulated | serum             | <a href="#">(L. Ng et al. 2017)</a>        | <a href="#">[183]</a> |
| miR-139-p3   | Upregulated   | plasma            | <a href="#">(Kanaan et al. 2013)</a>       | <a href="#">[184]</a> |
| miR-139-5p   | Upregulated   | serum             | <a href="#">(Miyoshi et al. 2017)</a>      | <a href="#">[185]</a> |
| miR-142-3p   | Downregulated | plasma            | <a href="#">(Ghanbari et al. 2015)</a>     | <a href="#">[163]</a> |
| miR-142-5p   | Upregulated   | tissue            | <a href="#">(Yin 2016)</a>                 | <a href="#">[186]</a> |
| miR-143      | Downregulated | serum             | <a href="#">(Hofsli et al. 2013)</a>       | <a href="#">[162]</a> |
| miR-143      | Downregulated | stool             | <a href="#">(Li et al. 2012)</a>           | <a href="#">[187]</a> |
| miR-143      | Downregulated | tumor tissue      | <a href="#">(Tsikitis et al. 2016)</a>     | <a href="#">[188]</a> |
| miR-143      | Downregulated | plasma            | <a href="#">(Ahmed et al. 2012)</a>        | <a href="#">[175]</a> |
| miR-143      | Upregulated   | plasma            | <a href="#">(Luo et al. 2013)</a>          | <a href="#">[173]</a> |

|             |               |                      |                                                   |                       |
|-------------|---------------|----------------------|---------------------------------------------------|-----------------------|
| miR-144     | Upregulated   | stool                | <a href="#">(Kalimutho et al. 2011)</a>           | <a href="#">[189]</a> |
| miR-144-3p  | Downregulated | tumor tissue         | <a href="#">(Sun et al. 2020)</a>                 | <a href="#">[190]</a> |
| miR-144-5p  | Downregulated | tumor tissue         | <a href="#">(Gao et al. 2022)</a>                 | <a href="#">[191]</a> |
| miR-145     | Downregulated | serum                | <a href="#">(Li et al. 2015)</a>                  | <a href="#">[172]</a> |
| miR-145     | Downregulated | tumor tissue         | <a href="#">(Tsikitis et al. 2016)</a>            | <a href="#">[188]</a> |
| miR-145     | Downregulated | serum                | <a href="#">(Ramzy et al. 2015)</a>               | <a href="#">[192]</a> |
| miR-145     | Downregulated | stool                | <a href="#">(Li et al. 2012)</a>                  | <a href="#">[187]</a> |
| miR-145     | Downregulated | tumor tissue         | <a href="#">(Yin 2016)</a>                        | <a href="#">[186]</a> |
| miR-145     | Upregulated   | plasma               | <a href="#">(Luo et al. 2013)</a>                 | <a href="#">[173]</a> |
| miR-146a    | Downregulated | plasma               | <a href="#">(Ahmed et al. 2012)</a>               | <a href="#">[175]</a> |
| miR-151-5p  | Downregulated | serum                | <a href="#">(Hofsli et al. 2013)</a>              | <a href="#">[162]</a> |
| miR-151a-5p | Upregulated   | cell lines           | <a href="#">(Xie et al. 2023)</a>                 | <a href="#">[193]</a> |
| miR-155     | Upregulated   | serum                | <a href="#">(Lv et al. 2015)</a>                  | <a href="#">[194]</a> |
| miR-155     | Upregulated   | serum                | <a href="#">(Hofsli et al. 2013)</a>              | <a href="#">[162]</a> |
| miR-15a-3p  | Upregulated   | tumor tissue         | <a href="#">(de Groen et al. 2015)</a>            | <a href="#">[195]</a> |
| miR-15b     | Upregulated   | serum                | <a href="#">(Han et al. 2021)</a>                 | <a href="#">[196]</a> |
| miR-15b     | Upregulated   | plasma               | <a href="#">(Giráldez et al. 2013)</a>            | <a href="#">[197]</a> |
| miR-15b     | Upregulated   | plasma               | <a href="#">(Herreros-Villanueva et al. 2019)</a> | <a href="#">[43]</a>  |
| miR-16      | Upregulated   | serum                | <a href="#">(Han et al. 2021)</a>                 | <a href="#">[196]</a> |
| miR-17      | Upregulated   | tumor tissue         | <a href="#">(de Groen et al. 2015)</a>            | <a href="#">[195]</a> |
| miR-17-3p   | Upregulated   | plasma               | <a href="#">(Ng et al. 2009)</a>                  | <a href="#">[19]</a>  |
| miR-17-3p   | Upregulated   | serum                | <a href="#">(Li et al. 2015)</a>                  | <a href="#">[172]</a> |
| miR-17-3p   | Upregulated   | plasma               | <a href="#">(Ahmed et al. 2012)</a>               | <a href="#">[175]</a> |
| miR-17-5p   | Upregulated   | serum                | <a href="#">(Fu et al. 2018)</a>                  | <a href="#">[198]</a> |
| miR-17-92   | Upregulated   | stool                | <a href="#">(Koga et al. 2010)</a>                | <a href="#">[180]</a> |
| miR-181a-3p | Upregulated   | plasma               | <a href="#">(Zhang et al. 2019)</a>               | <a href="#">[170]</a> |
| miR-181b    | Downregulated | serum                | <a href="#">(Wang et al. 2014)</a>                | <a href="#">[168]</a> |
| miR-182     | Upregulated   | plasma               | <a href="#">(X. Liu, Xu, et al. 2018)</a>         | <a href="#">[199]</a> |
| miR-182     | Upregulated   | plasma               | <a href="#">(Perilli et al. 2014)</a>             | <a href="#">[200]</a> |
| miR-183     | Upregulated   | tumor tissuse        | <a href="#">(Feng et al. 2021)</a>                | <a href="#">[201]</a> |
| miR-18a     | Upregulated   | stool                | <a href="#">(Yau et al. 2014)</a>                 | <a href="#">[202]</a> |
| miR-18a     | Upregulated   | plasma               | <a href="#">(Giráldez et al. 2013)</a>            | <a href="#">[197]</a> |
| miR-18a     | Upregulated   | plasma               | <a href="#">(Luo et al. 2013)</a>                 | <a href="#">[173]</a> |
| miR-18a     | Upregulated   | plasma               | <a href="#">(Wikberg et al. 2018)</a>             | <a href="#">[203]</a> |
| miR-18a     | Upregulated   | plasma               | <a href="#">(Herreros-Villanueva et al. 2019)</a> | <a href="#">[43]</a>  |
| miR-18a     | Upregulated   | tumor tissue, plasma | <a href="#">(Zhang et al. 2013)</a>               | <a href="#">[204]</a> |
| miR-18a     | Upregulated   | tumor tissuse        | <a href="#">(Yin 2016)</a>                        | <a href="#">[186]</a> |
| miR-18a-5p  | Upregulated   | plasma               | <a href="#">(Zhang et al. 2019)</a>               | <a href="#">[170]</a> |
| miR-18b     | Upregulated   | tumor tissue         | <a href="#">(Yin 2016)</a>                        | <a href="#">[186]</a> |
| miR-18b-5p  | Upregulated   | plasma               | <a href="#">(Zhang et al. 2019)</a>               | <a href="#">[170]</a> |
| miR-191     | Downregulated | serum                | <a href="#">(Hofsli et al. 2013)</a>              | <a href="#">[162]</a> |
| miR-193a    | Downregulated | plasma               | <a href="#">(Cho et al. 2021)</a>                 | <a href="#">[167]</a> |
| miR-194     | Downregulated | serum                | <a href="#">(Basati et al. 2016)</a>              | <a href="#">[205]</a> |
| miR-194-3p  | Downregulated | tumor tissue         | <a href="#">(Liu et al. 2021)</a>                 | <a href="#">[206]</a> |
| miR-195     | Downregulated | tumor tissue         | <a href="#">(Feng et al. 2021)</a>                | <a href="#">[201]</a> |
| miR-196a    | Upregulated   | plasma               | <a href="#">(Ahmed et al. 2012)</a>               | <a href="#">[175]</a> |

|            |                                |                      |                                                    |                       |
|------------|--------------------------------|----------------------|----------------------------------------------------|-----------------------|
| miR-196b   | Upregulated                    | tumor tissue         | <a href="#">(Bilegsaikhan et al. 2018)</a>         | <a href="#">[207]</a> |
| miR-199-3p | Downregulated                  | serum                | <a href="#">(Hofsli et al. 2013)</a>               | <a href="#">[162]</a> |
| miR-19a    | Upregulated                    | plasma               | <a href="#">(Giráldez et al. 2013)</a>             | <a href="#">[197]</a> |
| miR-19a-3p | Upregulated                    | serum                | <a href="#">(Zheng et al. 2014)</a>                | <a href="#">[208]</a> |
| miR-19a    | Upregulated                    | plasma               | <a href="#">(Herrerros-Villanueva et al. 2019)</a> | <a href="#">[43]</a>  |
| miR-19a-3p | Upregulated                    | serum                | <a href="#">(Zheng et al. 2014)</a>                | <a href="#">[208]</a> |
| miR-19a-3p | Upregulated                    | serum                | <a href="#">(Feng et al. 2021)</a>                 | <a href="#">[201]</a> |
| miR-19b    | Upregulated                    | plasma               | <a href="#">(Giráldez et al. 2013)</a>             | <a href="#">[197]</a> |
| miR-19b    | Upregulated                    | plasma               | <a href="#">(Herrerros-Villanueva et al. 2019)</a> | <a href="#">[43]</a>  |
| miR-200c   | Upregulated                    | plasma               | <a href="#">(Zhang et al. 2013)</a>                | <a href="#">[204]</a> |
| miR-203-3p | Upregulated                    | serum                | <a href="#">(Dokhanchi et al. 2021)</a>            | <a href="#">[166]</a> |
| miR-203    | Downregulated                  | serum                | <a href="#">(Wang et al. 2014)</a>                 | <a href="#">[168]</a> |
| miR-203    | Upregulated                    | stool                | <a href="#">(Ahmed et al. 2009)</a>                | <a href="#">[209]</a> |
| miR-203-3p | Upregulated                    | serum                | <a href="#">(Dokhanchi et al. 2021)</a>            | <a href="#">[166]</a> |
| miR-206    | Upregulated and Downregulated* | plasma, tumor tissue | <a href="#">(Xu et al. 2014)</a>                   | <a href="#">[210]</a> |
| miR-20a    | Upregulated                    | stool                | <a href="#">(Ahmed et al. 2009)</a>                | <a href="#">[209]</a> |
| miR-20a    | Upregulated                    | stool                | <a href="#">(Chang et al. 2016)</a>                | <a href="#">[211]</a> |
| miR-20a    | Upregulated                    | plasma               | <a href="#">(Chen et al. 2015)</a>                 | <a href="#">[171]</a> |
| miR-20a    | Upregulated                    | plasma               | <a href="#">(Ahmed et al. 2012)</a>                | <a href="#">[175]</a> |
| miR-20a    | Upregulated                    | plasma               | <a href="#">(Luo et al. 2013)</a>                  | <a href="#">[173]</a> |
| miR-20a    | Upregulated                    | tumor tissue         | <a href="#">(Feng et al. 2021)</a>                 | <a href="#">[201]</a> |
| miR-20a    | Upregulated                    | tumor tissue         | <a href="#">(de Groen et al. 2015)</a>             | <a href="#">[195]</a> |
| miR-20b-5p | Downregulated                  | tumor tissue         | <a href="#">(Yang et al. 2020)</a>                 | <a href="#">[212]</a> |
| miR-21     | Upregulated                    | stool                | <a href="#">(Link et al. 2010)</a>                 | <a href="#">[213]</a> |
| miR-21     | Upregulated                    | plasma               | <a href="#">(Luo et al. 2013)</a>                  | <a href="#">[173]</a> |
| miR-21     | Upregulated                    | plasma               | <a href="#">(Wikberg et al. 2018)</a>              | <a href="#">[203]</a> |
| miR-21     | Upregulated                    | plasma               | <a href="#">(Du et al. 2014)</a>                   | <a href="#">[214]</a> |
| miR-21     | Upregulated                    | plasma               | <a href="#">(Nassar et al. 2021)</a>               | <a href="#">[215]</a> |
| miR-21     | Upregulated                    | plasma               | <a href="#">(Ahmed et al. 2012)</a>                | <a href="#">[175]</a> |
| miR-21     | Upregulated                    | plasma               | <a href="#">(Zanutto et al. 2014)</a>              | <a href="#">[216]</a> |
| miR-21     | Upregulated                    | plasma               | <a href="#">(Kanaan et al. 2013)</a>               | <a href="#">[184]</a> |
| miR-21     | Upregulated                    | serum                | <a href="#">(Wang et al. 2012)</a>                 | <a href="#">[217]</a> |
| miR-21     | Upregulated                    | serum                | <a href="#">(Liu et al. 2013)</a>                  | <a href="#">[218]</a> |
| miR-21     | Upregulated                    | serum                | <a href="#">(Toiyama et al. 2013)</a>              | <a href="#">[26]</a>  |
| miR-21     | Upregulated                    | serum                | <a href="#">(Basati et al. 2014)</a>               | <a href="#">[219]</a> |
| miR-21     | Upregulated                    | stool                | <a href="#">(Wu et al. 2012)</a>                   | <a href="#">[220]</a> |
| miR-21     | Upregulated                    | serum                | <a href="#">(Han et al. 2021)</a>                  | <a href="#">[196]</a> |
| miR-21     | Upregulated                    | tumor tissue         | <a href="#">(Feng et al. 2021)</a>                 | <a href="#">[201]</a> |
| miR-21     | Upregulated                    | serum                | <a href="#">(Tsukamoto et al. 2017)</a>            | <a href="#">[221]</a> |
| miR-21     | Upregulated                    | serum, exosomal      | <a href="#">(Uratani et al. 2016)</a>              | <a href="#">[181]</a> |
| miR-21-5p  | Upregulated                    | plasma               | <a href="#">(Fukada et al. 2021)</a>               | <a href="#">[222]</a> |
| miR-210    | Upregulated                    | serum                | <a href="#">(Wang et al. 2017)</a>                 | <a href="#">[223]</a> |
| miR-210    | Upregulated                    | serum                | <a href="#">(Hofsli et al. 2013)</a>               | <a href="#">[162]</a> |
| miR-210    | Upregulated                    | plasma               | <a href="#">(Nassar et al. 2021)</a>               | <a href="#">[215]</a> |
| miR-212    | Upregulated                    | tumor tissue         | <a href="#">Yin/2016 [69]</a>                      | <a href="#">[186]</a> |

|             |                                 |                      |                                                       |                       |
|-------------|---------------------------------|----------------------|-------------------------------------------------------|-----------------------|
| miR-214     | Upregulated                     | plasma               | <a href="#">(Ahmed et al. 2012)</a>                   | <a href="#">[175]</a> |
| miR-216a-5p | Upregulated                     | tumor tissue         | <a href="#">(Liu et al. 2021)</a>                     | <a href="#">[206]</a> |
| miR-218     | Downregulated                   | tumor tissue, serum  | <a href="#">(Yu et al. 2013)</a>                      | <a href="#">[224]</a> |
| miR-22      | Upregulated                     | plasma               | <a href="#">(Wikberg et al. 2018)</a>                 | <a href="#">[203]</a> |
| miR-221     | Downregulated                   | serum                | <a href="#">(Hofsli et al. 2013)</a>                  | <a href="#">[162]</a> |
| miR-221     | Upregulated                     | plasma               | <a href="#">(Pu et al. 2010)</a>                      | <a href="#">[225]</a> |
| miR-221     | Upregulated                     | stool                | <a href="#">(Yau et al. 2014)</a>                     | <a href="#">[202]</a> |
| miR-221-3p  | Upregulated                     | serum                | <a href="#">(Dokhanchi et al. 2021)</a>               | <a href="#">[166]</a> |
| miR-222     | <i>Inconclusive</i>             | plasma               | <a href="#">(Ahmed et al. 2012)</a>                   | <a href="#">[175]</a> |
| miR-223     | Upregulated                     | serum                | <a href="#">(Tsukamoto et al. 2017)</a>               | <a href="#">[221]</a> |
| miR-223     | Upregulated                     | stool                | <a href="#">(Phua et al. 2014)</a>                    | <a href="#">[20]</a>  |
| miR-223     | Upregulated                     | stool, plasma        | <a href="#">(Chang et al. 2016)</a>                   | <a href="#">[211]</a> |
| miR-23a-3p  | Upregulated                     | serum                | <a href="#">(Vychytilova-Faltejskova et al. 2016)</a> | <a href="#">[226]</a> |
| miR-24      | Downregulated                   | plasma               | <a href="#">(Fang et al. 2015)</a>                    | <a href="#">[227]</a> |
| miR-25      | Upregulated                     | plasma               | <a href="#">(Wikberg et al. 2018)</a>                 | <a href="#">[203]</a> |
| miR-25      | Upregulated                     | serum                | <a href="#">(Ho et al. 2015)</a>                      | <a href="#">[174]</a> |
| miR-26a-5p  | Downregulated                   | plasma               | <a href="#">(Ghanbari et al. 2015)</a>                | <a href="#">[163]</a> |
| miR-27a     | Upregulated                     | plasma               | <a href="#">(X. Liu, Pan, et al. 2018)</a>            | <a href="#">[178]</a> |
| miR-27a-3p  | Upregulated                     | tumor tissue         | <a href="#">(Liang et al. 2017)</a>                   | <a href="#">[228]</a> |
| miR-27a-3p  | Upregulated                     | tumor tissue, plasma | <a href="#">(Ostenfeld et al. 2016)</a>               | <a href="#">[229]</a> |
| miR-27a-3p  | Upregulated                     | serum                | <a href="#">(Vychytilova-Faltejskova et al. 2016)</a> | <a href="#">[226]</a> |
| miR-28-3p   | Upregulated                     | plasma               | <a href="#">(Silva et al. 2021)</a>                   | <a href="#">[165]</a> |
| miR-29a     | Upregulated and Downregulated** | stool                | <a href="#">(Zhu et al. 2016)</a>                     | <a href="#">[230]</a> |
| miR-29a     | Upregulated                     | plasma               | <a href="#">(Wang et al. 2012)</a>                    | <a href="#">[217]</a> |
| miR-29a     | Upregulated                     | plasma               | <a href="#">(Giráldez et al. 2013)</a>                | <a href="#">[197]</a> |
| miR-29a     | Upregulated                     | plasma               | <a href="#">(Luo et al. 2013)</a>                     | <a href="#">[173]</a> |
| miR-29a     | Upregulated                     | plasma               | <a href="#">(Herrerros-Villanueva et al. 2019)</a>    | <a href="#">[43]</a>  |
| miR-29a     | Upregulated                     | plasma               | <a href="#">(Huang et al. 2010)</a>                   | <a href="#">[231]</a> |
| miR-29a     | Upregulated                     | serum                | <a href="#">(Hofsli et al. 2013)</a>                  | <a href="#">[162]</a> |
| miR-29b     | Downregulated                   | serum                | <a href="#">(Basati et al. 2016)</a>                  | <a href="#">[205]</a> |
| miR-30b     | Downregulated                   | serum                | <a href="#">(Ho et al. 2015)</a>                      | <a href="#">[174]</a> |
| miR-30a     | Downregulated                   | tumor tissue         | <a href="#">(Tsikitis et al. 2016)</a>                | <a href="#">[188]</a> |
| miR-30b     | Downregulated                   | serum                | <a href="#">(Ho et al. 2015)</a>                      | <a href="#">[174]</a> |
| miR-31      | Upregulated                     | tumor tissue         | <a href="#">(Wu et al. 2014)</a>                      | <a href="#">[27]</a>  |
| miR-31      | Upregulated                     | tumor tissue         | <a href="#">(Yin 2016)</a>                            | <a href="#">[186]</a> |
| miR-31      | Upregulated                     | serum                | <a href="#">(Han et al. 2021)</a>                     | <a href="#">[196]</a> |
| miR-31      | Downregulated                   | serum                | <a href="#">(Wang et al. 2014)</a>                    | <a href="#">[168]</a> |
| miR-320     | Downregulated                   | tumor tissue         | <a href="#">(Tadano et al. 2016)</a>                  | <a href="#">[232]</a> |
| miR-320a    | Downregulated                   | plasma               | <a href="#">(Fang et al. 2015)</a>                    | <a href="#">[227]</a> |
| miR-320a    | Upregulated                     | serum                | <a href="#">(Hofsli et al. 2013)</a>                  | <a href="#">[162]</a> |
| miR-320d    | Upregulated and Downregulated*  | tumor tissue, plasma | <a href="#">(X. Liu et al. 2019)</a>                  | <a href="#">[233]</a> |
| miR-335     | Upregulated                     | plasma               | <a href="#">(Giráldez et al. 2013)</a>                | <a href="#">[197]</a> |
| miR-335     | Upregulated                     | plasma               | <a href="#">(Herrerros-Villanueva et al. 2019)</a>    | <a href="#">[43]</a>  |

|             |                                  |                      |                                                       |                       |
|-------------|----------------------------------|----------------------|-------------------------------------------------------|-----------------------|
| miR-338-5p  | Upregulated                      | serum                | <a href="#">(Bilegsaikhan et al. 2018)</a>            | <a href="#">[207]</a> |
| miR-33b-5p  | Downregulated                    | tumor tissue         | <a href="#">(Cai et al. 2021)</a>                     | <a href="#">[234]</a> |
| miR-34c     | Upregulated                      | tumor tissue         | <a href="#">(Song et al. 2022)</a>                    | <a href="#">[235]</a> |
| miR-3677-3p | Downregulated                    | tumor tissue         | <a href="#">(Liu et al. 2021)</a>                     | <a href="#">[206]</a> |
| miR-372     | Upregulated                      | serum                | <a href="#">(Yu et al. 2016)</a>                      | <a href="#">[236]</a> |
| miR-375     | Downregulated                    | tumor tissue, plasma | <a href="#">(Xu et al. 2014)</a>                      | <a href="#">[210]</a> |
| miR-376c-3p | Upregulated                      | serum                | <a href="#">(Vychytilova-Faltejskova et al. 2016)</a> | <a href="#">[226]</a> |
| miR-377-3p  | Downregulated                    | serum                | <a href="#">(Wang et al. 2022)</a>                    | <a href="#">[237]</a> |
| miR-378     | Upregulated                      | plasma               | <a href="#">(Zanutto et al. 2014)</a>                 | <a href="#">[216]</a> |
| miR-378     | Upregulated                      | serum                | <a href="#">(Hofsli et al. 2013)</a>                  | <a href="#">[162]</a> |
| miR-381-3p  | Downregulated                    | serum                | <a href="#">(Wang et al. 2022)</a>                    | <a href="#">[237]</a> |
| miR-382     | Downregulated                    | serum                | <a href="#">(Hofsli et al. 2013)</a>                  | <a href="#">[162]</a> |
| miR-409-3p  | Downregulated                    | serum                | <a href="#">(Hofsli et al. 2013)</a>                  | <a href="#">[162]</a> |
| miR-409-3p  | Upregulated                      | plasma               | <a href="#">(Wang et al. 2015)</a>                    | <a href="#">[238]</a> |
| miR-422a    | Downregulated                    | serum                | <a href="#">(Zheng et al. 2014)</a>                   | <a href="#">[208]</a> |
| miR-423-3p  | Downregulated                    | serum                | <a href="#">(Hofsli et al. 2013)</a>                  | <a href="#">[162]</a> |
| miR-423-5p  | Downregulated                    | plasma               | <a href="#">(Fang et al. 2015)</a>                    | <a href="#">[227]</a> |
| miR-423-5p  | Upregulated                      | serum                | <a href="#">(Hofsli et al. 2013)</a>                  | <a href="#">[162]</a> |
| miR-425-5p  | Upregulated                      | plasma               | <a href="#">(Tan et al. 2019)</a>                     | <a href="#">[239]</a> |
| miR-431     | Upregulated                      | plasma               | <a href="#">(Kanaan et al. 2013)</a>                  | <a href="#">[184]</a> |
| miR-4316    | Upregulated                      | plasma               | <a href="#">(Krawczyk et al. 2017)</a>                | <a href="#">[240]</a> |
| miR-4478    | Downregulated                    | stool                | <a href="#">(Ghanbari et al. 2015)</a>                | <a href="#">[163]</a> |
| miR-449a    | Downregulated                    | tumor tissue         | <a href="#">(Lan et al. 2021)</a>                     | <a href="#">[241]</a> |
| miR-451     | Downregulated                    | tumor tissue         | <a href="#">Yin/2016 [69]</a>                         | <a href="#">[186]</a> |
| miR-451     | Upregulated                      | stool                | <a href="#">(Phua et al. 2014)</a>                    | <a href="#">[20]</a>  |
| miR-451a    | Downregulated                    | serum                | <a href="#">(Zhang et al. 2020)</a>                   | <a href="#">[242]</a> |
| miR-486     | Upregulated                      | serum                | <a href="#">(Ho et al. 2015)</a>                      | <a href="#">[174]</a> |
| miR-506     | Upregulated                      | plasma               | <a href="#">(Krawczyk et al. 2017)</a>                | <a href="#">[240]</a> |
| miR-542-5p  | Upregulated                      | plasma               | <a href="#">(Silva et al. 2021)</a>                   | <a href="#">[165]</a> |
| miR-601     | Downregulated                    | plasma               | <a href="#">(Wang et al. 2012)</a>                    | <a href="#">[217]</a> |
| miR-638     | Downregulated                    | tumor tissue         | <a href="#">(Yin 2016)</a>                            | <a href="#">[186]</a> |
| miR-652     | Downregulated                    | serum                | <a href="#">(Hofsli et al. 2013)</a>                  | <a href="#">[162]</a> |
| miR-7       | Upregulated                      | plasma               | <a href="#">(Ahmed et al. 2012)</a>                   | <a href="#">[175]</a> |
| miR-7       | Upregulated and<br>Downregulated | plasma               | <a href="#">(Wang et al. 2012)</a>                    | <a href="#">[238]</a> |
| miR-720     | Upregulated                      | serum                | <a href="#">(Hofsli et al. 2013)</a>                  | <a href="#">[162]</a> |
| miR-760     | Downregulated                    | plasma               | <a href="#">(Wang et al. 2012)</a>                    | <a href="#">[217]</a> |
| miR-92a-3p  | Upregulated                      | serum                | <a href="#">(Fu et al. 2018)</a>                      | <a href="#">[198]</a> |
| miR-92      | Upregulated                      | plasma               | <a href="#">Ng et al, 2009</a>                        | <a href="#">[19]</a>  |
| miR-92a     | Upregulated                      | serum                | <a href="#">(Liu et al. 2013)</a>                     | <a href="#">[218]</a> |
| miR-92a     | Upregulated                      | serum                | <a href="#">(Uratani et al. 2016)</a>                 | <a href="#">[181]</a> |
| miR-92a     | Upregulated                      | serum                | <a href="#">(Hofsli et al. 2013)</a>                  | <a href="#">[162]</a> |
| miR-92a     | Upregulated                      | plasma               | <a href="#">(Ahmed et al. 2012)</a>                   | <a href="#">[175]</a> |
| miR-92a     | Upregulated                      | plasma               | <a href="#">(Huang et al. 2010)</a>                   | <a href="#">[231]</a> |
| miR-92a     | Upregulated                      | plasma               | <a href="#">(Wang et al. 2012)</a>                    | <a href="#">[217]</a> |
| miR-92a     | Upregulated                      | plasma               | <a href="#">(Luo et al. 2013)</a>                     | <a href="#">[173]</a> |

|            |                     |                   |                                      |                       |
|------------|---------------------|-------------------|--------------------------------------|-----------------------|
| miR-92a    | Upregulated         | stool, plasma     | <a href="#">(Chang et al. 2016)</a>  | <a href="#">[211]</a> |
| miR-92a    | Upregulated         | stool             | <a href="#">(Wu et al. 2012)</a>     | <a href="#">[220]</a> |
| miR-92a-3p | Upregulated         | serum             | <a href="#">(Zheng et al. 2014)</a>  | <a href="#">[208]</a> |
| miR-93     | <i>Inconclusive</i> | tumor tissue      | <a href="#">(Yang et al. 2012)</a>   | <a href="#">[243]</a> |
| miR-96     | Upregulated         | plasma            | <a href="#">(Ahmed et al. 2012)</a>  | <a href="#">[175]</a> |
| miR-96     | Upregulated         | plasma            | <a href="#">(Sun et al. 2016)</a>    | <a href="#">[244]</a> |
| miR-96     | Upregulated         | plasma            | <a href="#">(Chen et al. 2022)</a>   | <a href="#">[245]</a> |
| miR-99a    | Downregulated       | lymph node tissue | <a href="#">(Wang et al. 2021)</a>   | <a href="#">[169]</a> |
| miR-99b    | Downregulated       | plasma            | <a href="#">(Chen et al. 2022)</a>   | <a href="#">[245]</a> |
| mi-148a    | Downregulated       | tumor tissue      | <a href="#">(Hibino et al. 2015)</a> | <a href="#">[246]</a> |
| miRNA-139  | Downregulated       | tumor tissue      | <a href="#">(Feng et al. 2021)</a>   | <a href="#">[201]</a> |

**\* If differential expression of certain miRNA appears in various tissues, type of tissue follows the same order as type of miRNA expression**

**\*\* Upregulated in rectal carcinoma, downregulated in colon carcinoma**

## References

162. Hofslis, E.; Sjursen, W.; Prestvik, W.S.; Johansen, J.; Rye, M.; Tranø, G.; Wasmuth, H.H.; Hatlevoll, I.; Thommesen, L. Identification of Serum microRNA Profiles in Colon Cancer. *Br. J. Cancer* **2013**, *108*, 1712–1719.
163. Ghanbari, R.; Mosakhani, N.; Asadi, J.; Nouraei, N.; Mowla, S.J.; Poustchi, H.; Malekzadeh, R.; Knuutila, S. Decreased Expression of Fecal miR-4478 and miR-1295b-3p in Early-Stage Colorectal Cancer. *Cancer Biomark.* **2015**, *15*, 189–195.
164. Han, H.-B.; Gu, J.; Zuo, H.-J.; Chen, Z.-G.; Zhao, W.; Li, M.; Ji, D.-B.; Lu, Y.-Y.; Zhang, Z.-Q. Let-7c Functions as a Metastasis Suppressor by Targeting MMP11 and PBX3 in Colorectal Cancer. *J. Pathol.* **2012**, *226*, 544–555.
165. Silva, C.M.S.; Barros-Filho, M.C.; Wong, D.V.T.; Mello, J.B.H.; Nobre, L.M.S.; Wanderley, C.W.S.; Lucetti, L.T.; Muniz, H.A.; Paiva, I.K.D.; Kuasne, H.; et al. Circulating Let-7e-5p, miR-106a-5p, miR-28-3p, and miR-542-5p as a Promising microRNA Signature for the Detection of Colorectal Cancer. *Cancers* **2021**, *13*, 1493.
166. Dokhanchi, M.; Pakravan, K.; Zareian, S.; Hussien, B.M.; Farid, M.; Razmara, E.; Mossahebi-Mohammadi, M.; Cho, W.C.; Babashah, S. Colorectal Cancer Cell-Derived Extracellular Vesicles Transfer miR-221-3p to Promote Endothelial Cell Angiogenesis via Targeting Suppressor of Cytokine Signaling 3. *Life Sci.* **2021**, *285*, 119937.
167. Cho, W.-C.; Kim, M.; Park, J.W.; Jeong, S.-Y.; Ku, J.-L. Exosomal miR-193a and Let-7g Accelerate Cancer Progression on Primary Colorectal Cancer and Paired Peritoneal Metastatic Cancer. *Transl. Oncol.* **2021**, *14*, 101000.
168. Wang, J.; Huang, S.-K.; Zhao, M.; Yang, M.; Zhong, J.-L.; Gu, Y.-Y.; Peng, H.; Che, Y.-Q.; Huang, C.-Z. Identification of a Circulating microRNA Signature for Colorectal Cancer Detection. *PLoS One* **2014**, *9*, e87451.
169. Wang, X.; Gao, G.; Chen, Z.; Chen, Z.; Han, M.; Xie, X.; Jin, Q.; Du, H.; Cao, Z.; Zhang, H. Identification of the miRNA Signature and Key Genes in Colorectal Cancer Lymph Node Metastasis. *Cancer Cell Int.* **2021**, *21*, 1–12.
170. Zhang, H.; Zhu, M.; Shan, X.; Zhou, X.; Wang, T.; Zhang, J.; Tao, J.; Cheng, W.; Chen, G.; Li, J.; et al. A Panel of Seven-miRNA Signature in Plasma as Potential Biomarker for Colorectal Cancer Diagnosis. *Gene* **2019**, *687*, 246–254.
171. Chen, W.-Y.; Zhao, X.-J.; Yu, Z.-F.; Hu, F.-L.; Liu, Y.-P.; Cui, B.-B.; Dong, X.-S.; Zhao, Y.-S. The Potential of Plasma miRNAs for Diagnosis and Risk Estimation of Colorectal Cancer. *Int. J. Clin. Exp. Pathol.* **2015**, *8*, 7092–7101.
172. Li, J.; Liu, Y.; Wang, C.; Deng, T.; Liang, H.; Wang, Y.; Huang, D.; Fan, Q.; Wang, X.; Ning, T.; et al. Serum miRNA Expression Profile as a Prognostic Biomarker of Stage II/III Colorectal Adenocarcinoma. *Sci. Rep.* **2015**, *5*, 12921.
173. Luo, X.; Stock, C.; Burwinkel, B.; Brenner, H. Identification and Evaluation of Plasma MicroRNAs for Early Detection of Colorectal Cancer. *PLoS One* **2013**, *8*, e62880.
174. Ho, G.Y.F.; Jung, H.J.; Schoen, R.E.; Wang, T.; Lin, J.; Williams, Z.; Weissfeld, J.L.; Park, J.Y.; Loudig, O.; Suh, Y. Differential Expression of Circulating microRNAs according to Severity of Colorectal Neoplasia. *Transl. Res.* **2015**, *166*, 225–232.
175. Ahmed, F.E.; Amed, N.C.; Vos, P.W.; Bonnerup, C.; Atkins, J.N.; Casey, M.; Nuovo, G.J.; Naziri, W.; Wiley, J.E.; Allison, R.R. Diagnostic microRNA Markers to Screen for Sporadic Human Colon Cancer in Blood. *Cancer Genomics Proteomics* **2012**, *9*, 179–192.
176. Liu, D.-R.; Guan, Q.-L.; Gao, M.-T.; Jiang, L.; Kang, H.-X. miR-1260b Is a Potential Prognostic Biomarker in Colorectal Cancer. *Med. Sci. Monit.* **2016**, *22*, 2417–2423.
177. Imaoka, H.; Toiyama, Y.; Fujikawa, H.; Hiro, J.; Saigusa, S.; Tanaka, K.; Inoue, Y.; Mohri, Y.; Mori, T.; Kato, T.; et al. Circulating microRNA-1290 as a Novel Diagnostic and Prognostic Biomarker in Human Colorectal Cancer. *Ann. Oncol.* **2016**, *27*, 1879–1886.
178. Liu, X.; Pan, B.; Sun, L.; Chen, X.; Zeng, K.; Hu, X.; Xu, T.; Xu, M.; Wang, S. Circulating Exosomal miR-27a and miR-130a Act as Novel Diagnostic and Prognostic Biomarkers of Colorectal Cancer. *Cancer Epidemiol. Biomarkers Prev.* **2018**, *27*, 746–754.



179. Xie, B.; Gong, N.; Guo, Y.; Hu, G. MicroRNA-133b Expression Inversely Correlates with MET and Can Serve as an Optimum Predictive Biomarker for Patients of Colorectal Cancer. *Transl. Cancer Res.* **2021**, *10*, 57–64.
180. Koga, Y.; Yasunaga, M.; Takahashi, A.; Kuroda, J.; Moriya, Y.; Akasu, T.; Fujita, S.; Yamamoto, S.; Baba, H.; Matsumura, Y. MicroRNA Expression Profiling of Exfoliated Colonocytes Isolated from Feces for Colorectal Cancer Screening. *Cancer Prev. Res.* **2010**, *3*, 1435–1442.
181. Uratani, R.; Toiyama, Y.; Kitajima, T.; Kawamura, M.; Hiro, J.; Kobayashi, M.; Tanaka, K.; Inoue, Y.; Mohri, Y.; Mori, T.; et al. Diagnostic Potential of Cell-Free and Exosomal MicroRNAs in the Identification of Patients with High-Risk Colorectal Adenomas. *PLoS One* **2016**, *11*, e0160722.
182. Chen, T.; Cai, S.-L.; Li, J.; Qi, Z.-P.; Li, X.-Q.; Ye, L.-C.; Xie, X.-F.; Hou, Y.-Y.; Yao, L.-Q.; Xu, M.-D.; et al. Mecp2-Mediated Epigenetic Silencing of miR-137 Contributes to Colorectal Adenoma-Carcinoma Sequence and Tumor Progression via Relieving the Suppression of c-Met. *Sci. Rep.* **2017**, *7*, 44543.
183. Ng, L.; Wan, T.M.-H.; Man, J.H.-W.; Chow, A.K.-M.; Iyer, D.; Chen, G.; Yau, T.C.-C.; Lo, O.S.-H.; Foo, D.C.-C.; Poon, J.T.-C.; et al. Identification of Serum miR-139-3p as a Non-Invasive Biomarker for Colorectal Cancer. *Oncotarget* **2017**, *8*, 27393–27400.
184. Kanaan, Z.; Roberts, H.; Eichenberger, M.R.; Billeter, A.; Ocheretner, G.; Pan, J.; Rai, S.N.; Jorden, J.; Williford, A.; Galandiuk, S. A Plasma microRNA Panel for Detection of Colorectal Adenomas: A Step toward More Precise Screening for Colorectal Cancer. *Ann. Surg.* **2013**, *258*, 400–408.
185. Miyoshi, J.; Toden, S.; Yoshida, K.; Toiyama, Y.; Alberts, S.R.; Kusunoki, M.; Sinicrope, F.A.; Goel, A. MiR-139-5p as a Novel Serum Biomarker for Recurrence and Metastasis in Colorectal Cancer. *Sci. Rep.* **2017**, *7*, 43393.
186. Systematic Analysis of Key miRNAs and Related Signaling Pathways in Colorectal Tumorigenesis. *Gene* **2016**, *578*, 177–184.
187. Li, J.-M.; Zhao, R.-H.; Li, S.-T.; Xie, C.-X.; Jiang, H.-H.; Ding, W.-J.; Du, P.; Chen, W.; Yang, M.; Cui, L. Down-Regulation of Fecal miR-143 and miR-145 as Potential Markers for Colorectal Cancer. *Saudi Med. J.* **2012**, *33*, 24–29.
188. Tsikitis, V.L.; Potter, A.; Mori, M.; Buckmeier, J.A.; Preece, C.R.; Harrington, C.A.; Bartley, A.N.; Bhattacharyya, A.K.; Hamilton, S.R.; Lance, M.P.; et al. MicroRNA Signatures of Colonic Polyps on Screening and Histology. *Cancer Prev. Res.* **2016**, *9*, 942–949.
189. Kalimutho, M.; Del Vecchio Blanco, G.; Di Cecilia, S.; Sileri, P.; Cretella, M.; Pallone, F.; Federici, G.; Bernardini, S. Differential Expression of miR-144\* as a Novel Fecal-Based Diagnostic Marker for Colorectal Cancer. *J. Gastroenterol.* **2011**, *46*, 1391–1402.
190. Sun, N.; Zhang, L.; Zhang, C.; Yuan, Y. miR-144-3p Inhibits Cell Proliferation of Colorectal Cancer Cells by Targeting BCL6 via Inhibition of Wnt/ $\beta$ -Catenin Signaling. *Cell. Mol. Biol. Lett.* **2020**, *25*, 19.
191. Gao, Z.; Jiang, J.; Hou, L.; Zhang, B. Dysregulation of MiR-144-5p/RNF187 Axis Contributes To the Progression of Colorectal Cancer. *J Transl Int Med* **2022**, *10*, 65–75.
192. Ramzy, I.; Hasaballah, M.; Marzaban, R.; Shaker, O.; Soliman, Z.A. Evaluation of microRNAs-29a, 92a and 145 in Colorectal Carcinoma as Candidate Diagnostic Markers: An Egyptian Pilot Study. *Clin. Res. Hepatol. Gastroenterol.* **2015**, *39*, 508–515.
193. Xie, Y.; Zhang, Y.; Liu, X.; Cao, L.; Han, M.; Wang, C.; Chen, J.; Zhang, X. miR-151a-5p Promotes the Proliferation and Metastasis of Colorectal Carcinoma Cells by Targeting AGMAT. *Oncol. Rep.* **2023**, *49*, doi:10.3892/or.2023.8487.
194. Lv, Z.-C.; Fan, Y.-S.; Chen, H.-B.; Zhao, D.-W. Investigation of microRNA-155 as a Serum Diagnostic and Prognostic Biomarker for Colorectal Cancer. *Tumour Biol.* **2015**, *36*, 1619–1625.
195. de Groen, F.L.M.; Timmer, L.M.; Menezes, R.X.; Diosdado, B.; Hooijberg, E.; Meijer, G.A.; Steenbergen, R.D.M.; Carvalho, B. Oncogenic Role of miR-15a-3p in 13q Amplicon-Driven Colorectal Adenoma-to-Carcinoma Progression. *PLoS One* **2015**, *10*, e0132495.
196. Han, L.; Shi, W.-J.; Xie, Y.-B.; Zhang, Z.-G. Diagnostic Value of Four Serum Exosome microRNAs Panel for the Detection of Colorectal Cancer. *World J. Gastrointest. Oncol.* **2021**, *13*, 970–979.
197. Giráldez, M.D.; Lozano, J.J.; Ramírez, G.; Hijona, E.; Bujanda, L.; Castells, A.; Gironella, M. Circulating microRNAs as Biomarkers of Colorectal Cancer: Results from a Genome-Wide Profiling and Validation Study. *Clin. Gastroenterol. Hepatol.* **2013**, *11*, 681–688.e3.
198. Fu, F.; Jiang, W.; Zhou, L.; Chen, Z. Circulating Exosomal miR-17-5p and miR-92a-3p Predict Pathologic Stage and Grade of Colorectal Cancer. *Transl. Oncol.* **2018**, *11*, 221–232.
199. Liu, X.; Xu, T.; Hu, X.; Chen, X.; Zeng, K.; Sun, L.; Wang, S. Elevated Circulating miR-182 Acts as a Diagnostic Biomarker for Early Colorectal Cancer. *Cancer Manag. Res.* **2018**, *10*, 857–865.
200. Perilli, L.; Vicentini, C.; Agostini, M.; Pizzini, S.; Pizzi, M.; D'Angelo, E.; Bortoluzzi, S.; Mandruzzato, S.; Mammano, E.; Rugge, M.; et al. Circulating miR-182 Is a Biomarker of Colorectal Adenocarcinoma Progression. *Oncotarget* **2014**, *5*, 6611–6619.
201. Feng, J.; Wei, Q.; Yang, M.; Wang, X.; Liu, B.; Li, J. Development and Validation of a Novel miRNA Classifier as a Prognostic Signature for Stage II/III Colorectal Cancer. *Ann Transl Med* **2021**, *9*, 747.
202. Yau, T.O.; Wu, C.W.; Dong, Y.; Tang, C.-M.; Ng, S.S.M.; Chan, F.K.L.; Sung, J.J.Y.; Yu, J. microRNA-221 and microRNA-18a Identification in Stool as Potential Biomarkers for the Non-Invasive Diagnosis of Colorectal Carcinoma. *Br. J. Cancer* **2014**, *111*, 1765–1771.
203. Wikberg, M.L.; Myte, R.; Palmqvist, R.; van Guelpen, B.; Ljuslinder, I. Plasma miRNA Can Detect Colorectal Cancer, but How Early? *Cancer Med.* **2018**, *7*, 1697–1705.
204. Zhang, G.-J.; Zhou, T.; Liu, Z.-L.; Tian, H.-P.; Xia, S.-S. Plasma miR-200c and miR-18a as Potential Biomarkers for the Detection of Colorectal Carcinoma. *Mol Clin Oncol* **2013**, *1*, 379–384.
205. Basati, G.; Razavi, A.E.; Pakzad, I.; Malayeri, F.A. Circulating Levels of the miRNAs, miR-194, and miR-29b, as Clinically Useful Biomarkers for Colorectal Cancer. *Tumour Biol.* **2016**, *37*, 1781–1788.

206. Liu, Z.; Lu, T.; Wang, Y.; Jiao, D.; Li, Z.; Wang, L.; Liu, L.; Guo, C.; Zhao, Y.; Han, X. Establishment and Experimental Validation of an Immune miRNA Signature for Assessing Prognosis and Immune Landscape of Patients with Colorectal Cancer. *J. Cell. Mol. Med.* **2021**, *25*, 6874–6886.
207. Bilegsaikhan, E.; Liu, H.N.; Shen, X.Z.; Liu, T.T. Circulating miR-338-5p Is a Potential Diagnostic Biomarker in Colorectal Cancer. *J. Dig. Dis.* **2018**, *19*, 404–410.
208. Zheng, G.; Du, L.; Yang, X.; Zhang, X.; Wang, L.; Yang, Y.; Li, J.; Wang, C. Serum microRNA Panel as Biomarkers for Early Diagnosis of Colorectal Adenocarcinoma. *Br. J. Cancer* **2014**, *111*, 1985–1992.
209. Ahmed, F.E.; Jeffries, C.D.; Vos, P.W.; Flake, G.; Nuovo, G.J.; Sinar, D.R.; Naziri, W.; Marcuard, S.P. Diagnostic microRNA Markers for Screening Sporadic Human Colon Cancer and Active Ulcerative Colitis in Stool and Tissue. *Cancer Genomics Proteomics* **2009**, *6*, 281–295.
210. Xu, L.; Li, M.; Wang, M.; Yan, D.; Feng, G.; An, G. The Expression of microRNA-375 in Plasma and Tissue Is Matched in Human Colorectal Cancer. *BMC Cancer* **2014**, *14*, 714.
211. Chang, P.-Y.; Chen, C.-C.; Chang, Y.-S.; Tsai, W.-S.; You, J.-F.; Lin, G.-P.; Chen, T.-W.; Chen, J.-S.; Chan, E.-C. MicroRNA-223 and microRNA-92a in Stool and Plasma Samples Act as Complementary Biomarkers to Increase Colorectal Cancer Detection. *Oncotarget* **2016**, *7*, 10663–10675.
212. Yang, H.; Lin, J.; Jiang, J.; Ji, J.; Wang, C.; Zhang, J. miR-20b-5p Functions as Tumor Suppressor microRNA by Targeting cyclinD1 in Colon Cancer. *Cell Cycle* **2020**, *19*, 2939–2954.
213. Link, A.; Balaguer, F.; Shen, Y.; Nagasaka, T.; Lozano, J.J.; Boland, C.R.; Goel, A. Fecal MicroRNAs as Novel Biomarkers for Colon Cancer Screening. *Cancer Epidemiol. Biomarkers Prev.* **2010**, *19*, 1766–1774.
214. Du, M.; Liu, S.; Gu, D.; Wang, Q.; Zhu, L.; Kang, M.; Shi, D.; Chu, H.; Tong, N.; Chen, J.; et al. Clinical Potential Role of Circulating microRNAs in Early Diagnosis of Colorectal Cancer Patients. *Carcinogenesis* **2014**, *35*, 2723–2730.
215. Nassar, F.J.; Msheik, Z.S.; Itani, M.M.; Helou, R.E.; Hadla, R.; Kreidieh, F.; Bejjany, R.; Mukherji, D.; Shamseddine, A.; Nasr, R.R.; et al. Circulating miRNA as Biomarkers for Colorectal Cancer Diagnosis and Liver Metastasis. *Diagnostics (Basel)* **2021**, *11*, doi:10.3390/diagnostics11020341.
216. Zanutto, S.; Pizzamiglio, S.; Ghilotti, M.; Bertan, C.; Ravagnani, F.; Perrone, F.; Leo, E.; Pilotti, S.; Verderio, P.; Gariboldi, M.; et al. Circulating miR-378 in Plasma: A Reliable, Haemolysis-Independent Biomarker for Colorectal Cancer. *Br. J. Cancer* **2014**, *110*, 1001–1007.
217. Wang, Q.; Huang, Z.; Ni, S.; Xiao, X.; Xu, Q.; Wang, L.; Huang, D.; Tan, C.; Sheng, W.; Du, X. Plasma miR-601 and miR-760 Are Novel Biomarkers for the Early Detection of Colorectal Cancer. *PLoS One* **2012**, *7*, e44398.
218. Liu, G.-H.; Zhou, Z.-G.; Chen, R.; Wang, M.-J.; Zhou, B.; Li, Y.; Sun, X.-F. Serum miR-21 and miR-92a as Biomarkers in the Diagnosis and Prognosis of Colorectal Cancer. *Tumor Biology* **2013**, *34*, 2175–2181.
219. Basati, G.; Emami Razavi, A.; Abdi, S.; Mirzaei, A. Elevated Level of microRNA-21 in the Serum of Patients with Colorectal Cancer. *Med. Oncol.* **2014**, *31*, 205.
220. Wu, C.W.; Ng, S.S.M.; Dong, Y.J.; Ng, S.C.; Leung, W.W.; Lee, C.W.; Wong, Y.N.; Chan, F.K.L.; Yu, J.; Sung, J.J.Y. Detection of miR-92a and miR-21 in Stool Samples as Potential Screening Biomarkers for Colorectal Cancer and Polyps. *Gut* **2012**, *61*, 739–745.
221. Tsukamoto, M.; Iinuma, H.; Yagi, T.; Matsuda, K.; Hashiguchi, Y. Circulating Exosomal MicroRNA-21 as a Biomarker in Each Tumor Stage of Colorectal Cancer. *Oncology* **2017**, *92*, 360–370.
222. Fukada, M.; Matsushashi, N.; Takahashi, T.; Sugito, N.; Heishima, K.; Yoshida, K.; Akao, Y. Postoperative Changes in Plasma miR21-5p as a Novel Biomarker for Colorectal Cancer Recurrence: A Prospective Study. *Cancer Sci.* **2021**, *112*, 4270–4280.
223. Wang, W.; Qu, A.; Liu, W.; Liu, Y.; Zheng, G.; Du, L.; Zhang, X.; Yang, Y.; Wang, C.; Chen, X. Circulating miR-210 as a Diagnostic and Prognostic Biomarker for Colorectal Cancer. *Eur. J. Cancer Care* **2017**, *26*, doi:10.1111/ecc.12448.
224. Yu, H.; Gao, G.; Jiang, L.; Guo, L.; Lin, M.; Jiao, X.; Jia, W.; Huang, J. Decreased Expression of miR-218 Is Associated with Poor Prognosis in Patients with Colorectal Cancer. *Int. J. Clin. Exp. Pathol.* **2013**, *6*, 2904–2911.
225. Pu, X.-X.; Huang, G.-L.; Guo, H.-Q.; Guo, C.-C.; Li, H.; Ye, S.; Ling, S.; Jiang, L.; Tian, Y.; Lin, T.-Y. Circulating miR-221 Directly Amplified from Plasma Is a Potential Diagnostic and Prognostic Marker of Colorectal Cancer and Is Correlated with p53 Expression. *J. Gastroenterol. Hepatol.* **2010**, *25*, 1674–1680.
226. Vychytilova-Faltejskova, P.; Radova, L.; Sachlova, M.; Kosarova, Z.; Slaba, K.; Fabian, P.; Grolich, T.; Prochazka, V.; Kala, Z.; Svoboda, M.; et al. Serum-Based microRNA Signatures in Early Diagnosis and Prognosis Prediction of Colon Cancer. *Carcinogenesis* **2016**, *37*, 941–950.
227. Fang, Z.; Tang, J.; Bai, Y.; Lin, H.; You, H.; Jin, H.; Lin, L.; You, P.; Li, J.; Dai, Z.; et al. Plasma Levels of microRNA-24, microRNA-320a, and microRNA-423-5p Are Potential Biomarkers for Colorectal Carcinoma. *J. Exp. Clin. Cancer Res.* **2015**, *34*, 86.
228. Liang, J.; Tang, J.; Shi, H.; Li, H.; Zhen, T.; Duan, J.; Kang, L.; Zhang, F.; Dong, Y.; Han, A. miR-27a-3p Targeting RXR $\alpha$  Promotes Colorectal Cancer Progression by Activating Wnt/ $\beta$ -Catenin Pathway. *Oncotarget* **2017**, *8*, 82991–83008.
229. Ostenfeld, M.S.; Jensen, S.G.; Jeppesen, D.K.; Christensen, L.-L.; Thorsen, S.B.; Stenvang, J.; Hvam, M.L.; Thomsen, A.; Mouritzen, P.; Rasmussen, M.H.; et al. miRNA Profiling of Circulating EpCAM(+) Extracellular Vesicles: Promising Biomarkers of Colorectal Cancer. *J Extracell Vesicles* **2016**, *5*, 31488.
230. Zhu, Y.; Xu, A.; Li, J.; Fu, J.; Wang, G.; Yang, Y.; Cui, L.; Sun, J. Fecal miR-29a and miR-224 as the Noninvasive Biomarkers for Colorectal Cancer. *Cancer Biomark.* **2016**, *16*, 259–264.



231. Huang, Z.; Huang, D.; Ni, S.; Peng, Z.; Sheng, W.; Du, X. Plasma microRNAs Are Promising Novel Biomarkers for Early Detection of Colorectal Cancer. *Int. J. Cancer* **2010**, *127*, 118–126.
232. Tadano, T.; Kakuta, Y.; Hamada, S.; Shimodaira, Y.; Kuroha, M.; Kawakami, Y.; Kimura, T.; Shiga, H.; Endo, K.; Masamune, A.; et al. MicroRNA-320 Family Is Downregulated in Colorectal Adenoma and Affects Tumor Proliferation by Targeting CDK6. *World J. Gastrointest. Oncol.* **2016**, *8*, 532–542.
233. Liu, X.; Xu, X.; Pan, B.; He, B.; Chen, X.; Zeng, K.; Xu, M.; Pan, Y.; Sun, H.; Xu, T.; et al. Circulating miR-1290 and miR-320d as Novel Diagnostic Biomarkers of Human Colorectal Cancer. *J. Cancer* **2019**, *10*, 43–50.
234. Cai, R.; Lu, Q.; Wang, D. Construction and Prognostic Analysis of miRNA-mRNA Regulatory Network in Liver Metastasis from Colorectal Cancer. *World J. Surg. Oncol.* **2021**, *19*, 7.
235. Song, H.; Ruan, C.; Xu, Y.; Xu, T.; Fan, R.; Jiang, T.; Cao, M.; Song, J. Survival Stratification for Colorectal Cancer via Multi-Omics Integration Using an Autoencoder-Based Model. *Exp. Biol. Med.* **2022**, *247*, 898–909.
236. Yu, J.; Jin, L.; Jiang, L.; Gao, L.; Zhou, J.; Hu, Y.; Li, W.; Zhi, Q.; Zhu, X. Serum miR-372 Is a Diagnostic and Prognostic Biomarker in Patients with Early Colorectal Cancer. *Anticancer Agents Med. Chem.* **2016**, *16*, 424–431.
237. Wang, L.; Song, X.; Yu, M.; Niu, L.; Zhao, Y.; Tang, Y.; Zheng, B.; Song, X.; Xie, L. Serum Exosomal miR-377-3p and miR-381-3p as Diagnostic Biomarkers in Colorectal Cancer. *Future Oncol.* **2022**, *18*, 793–805.
238. Wang, S.; Xiang, J.; Li, Z.; Lu, S.; Hu, J.; Gao, X.; Yu, L.; Wang, L.; Wang, J.; Wu, Y.; et al. A Plasma microRNA Panel for Early Detection of Colorectal Cancer. *Int. J. Cancer* **2015**, *136*, 152–161.
239. Tan, Y.; Lin, J.-J.; Yang, X.; Gou, D.-M.; Fu, L.; Li, F.-R.; Yu, X.-F. A Panel of Three Plasma microRNAs for Colorectal Cancer Diagnosis. *Cancer Epidemiol.* **2019**, *60*, 67–76.
240. Krawczyk, P.; Powrózek, T.; Olesiński, T.; Dmitruk, A.; Dziwota, J.; Kowalski, D.; Milanowski, J. Evaluation of miR-506 and miR-4316 Expression in Early and Non-Invasive Diagnosis of Colorectal Cancer. *Int. J. Colorectal Dis.* **2017**, *32*, 1057–1060.
241. Lan, S.-H.; Lin, S.-C.; Wang, W.-C.; Yang, Y.-C.; Lee, J.-C.; Lin, P.-W.; Chu, M.-L.; Lan, K.-Y.; Zucchini, R.; Liu, H.-S.; et al. Autophagy Upregulates miR-449a Expression to Suppress Progression of Colorectal Cancer. *Front. Oncol.* **2021**, *11*, doi:10.3389/fonc.2021.738144.
242. Zhang, Z.; Zhang, D.; Cui, Y.; Qiu, Y.; Miao, C.; Lu, X. Identification of microRNA-451a as a Novel Circulating Biomarker for Colorectal Cancer Diagnosis. *Biomed Res. Int.* **2020**, *2020*, 5236236.
243. Yang, I.-P.; Tsai, H.-L.; Hou, M.-F.; Chen, K.-C.; Tsai, P.-C.; Huang, S.-W.; Chou, W.-W.; Wang, J.-Y.; Juo, S.-H.H. MicroRNA-93 Inhibits Tumor Growth and Early Relapse of Human Colorectal Cancer by Affecting Genes Involved in the Cell Cycle. *Carcinogenesis* **2012**, *33*, 1522–1530.
244. Sun, Y.; Liu, Y.; Cogdell, D.; Calin, G.A.; Sun, B.; Kopetz, S.; Hamilton, S.R.; Zhang, W. Examining Plasma microRNA Markers for Colorectal Cancer at Different Stages. *Oncotarget* **2016**, *7*, 11434–11449.
245. Chen, Y.; Liu, H.; Ning, S.; Wei, C.; Li, J.; Wei, W.; Zhang, L. The High Ratio of the Plasma miR-96/miR-99b Correlated With Poor Prognosis in Patients With Metastatic Colorectal Cancer. *Front. Mol. Biosci.* **2022**, *8*, doi:10.3389/fmolb.2021.799060.
246. Hibino, Y.; Sakamoto, N.; Naito, Y.; Goto, K.; Oo, H.Z.; Sentani, K.; Hinoi, T.; Ohdan, H.; Oue, N.; Yasui, W. Significance of miR-148a in Colorectal Neoplasia: Downregulation of miR-148a Contributes to the Carcinogenesis and Cell Invasion of Colorectal Cancer. *Pathobiology* **2015**, *82*, 233–241.
